# Supplementary material for: Kv3.1 uses a timely resurgent K+ current to secure action potential repolarization
Source: PubMed Central journal article supplement — Nat Commun. 2015 Dec 17;6:10173. doi: 10.1038/ncomms10173 (PMC4703866; doi:10.1038/ncomms10173), 2015-12-17
Supplement: ncomms10173-s1.pdf [file ncomms10173-s1.pdf]

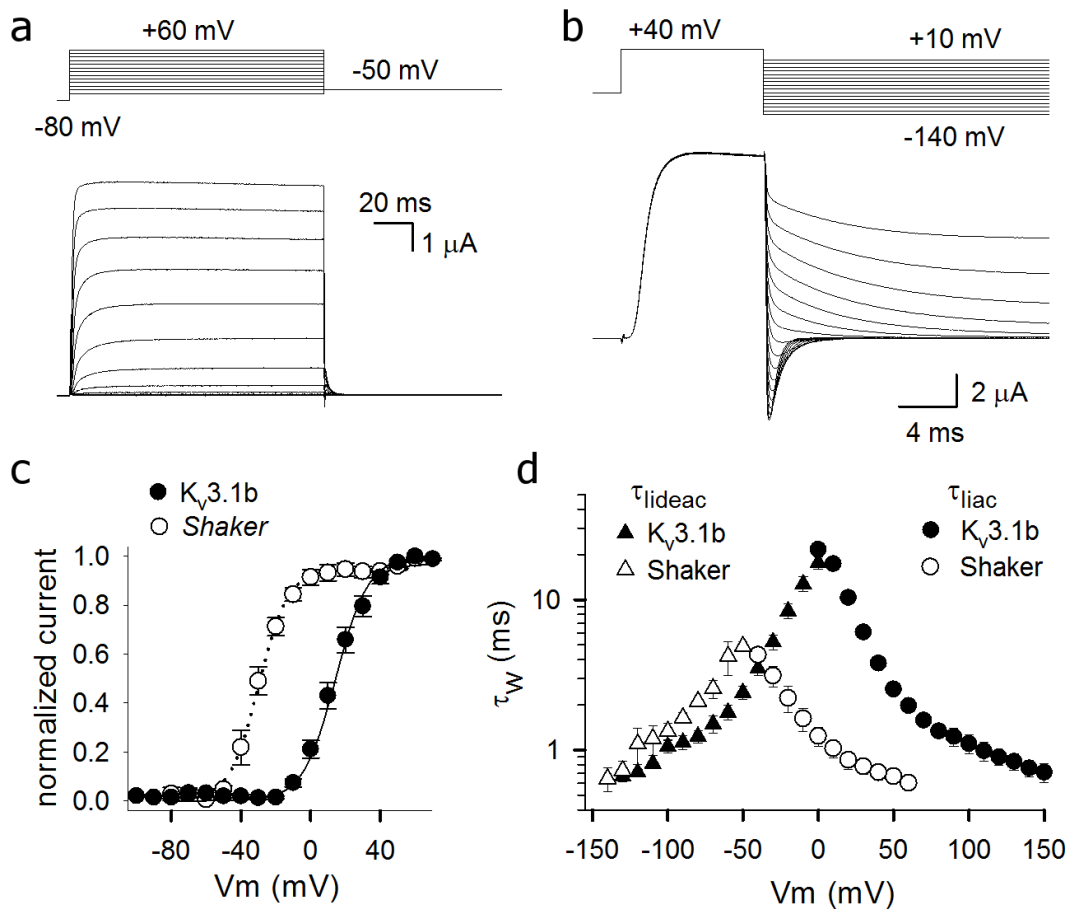

**Supplementary Figure 1:  $K_v3.1b$  ionic current recordings monitor gate opening and closing.**

(a) Activating ionic currents ( $I_{i_{ac}}$ ) from  $K_v3.1b$  obtained using the pulse protocol shown on top. (b) Deactivating ionic currents ( $I_{i_{deac}}$ ) upon a short +40 mV depolarizing pulse to open the channels. (c) Voltage dependence of channel gate opening: conduction ( $G$ ) versus voltage ( $V$ ) curves for  $K_v3.1b$  (black circles,  $n = 11$ ) and Shaker (open circles,  $n = 7$ ) channels determined from the tail currents obtained with pulse protocols shown in a. Tail current amplitudes were normalized and plotted as a function of the pulse depolarization potential and the represented  $G$ - $V$  curves are the average fit to a 2-state Boltzmann equation. Note the high threshold for channel opening in  $K_v3.1b$  compared to Shaker. (d) Weighted time constants ( $\tau_w$ )  $\pm$  SEM of channel gate opening (circles,  $\tau_{liac}$ ) and closing (triangles,  $\tau_{lideac}$ ) for  $K_v3.1b$  (black symbol,  $n = 11$ ) and Shaker (open symbols,  $n = 7$ ). These values were obtained from fitting  $I_{i_{ac}}$  and  $I_{i_{deac}}$  with a single and double exponential respectively. Note that  $K_v3.1b$  and Shaker displayed similarly fast  $\tau_{liac}$  and  $\tau_{lideac}$  kinetics.

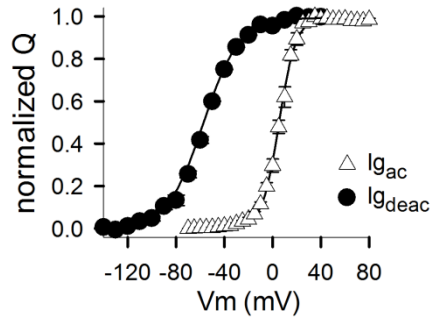

**Supplementary Figure 2: Voltage dependence of K<sub>v</sub>3.1b VSD deactivation suggests a slow I<sub>g</sub>deac component.**

The deactivating QV curve (black circles), to determine the voltage dependence of VSD deactivation, was obtained from integrating the I<sub>g</sub>deac currents from deactivation pulse protocols shown in Supplementary Fig. 1b. Compared to the voltage dependence of VSD activation (open triangles, which is redisplayed from Supplementary Fig. 1c), the deactivating QV curve located at more negative potentials, displaying a midpoint at  $-55.5 \pm 2.3$  mV ( $n = 6$ ). A similar displacement in the deactivating QV curve was also observed in K<sub>v</sub>3.2 channels<sup>4</sup>. The voltage range over which the QV curve was shifted when obtained from a deactivation protocol versus an activation protocol corresponded with the voltage window where  $\tau_{I_{deac}}$  was slower than  $\tau_{I_{gdeac}}$  (Supplementary Fig. 1d). As this displacement in voltage dependence of charge movement was not reflected at the ionic current level and K<sub>v</sub>3.1b channels close completely at repolarizations stronger than -10 mV, this displacement of the QV curve is most likely due to the presence of a slow, undetectable I<sub>g</sub>deac component.

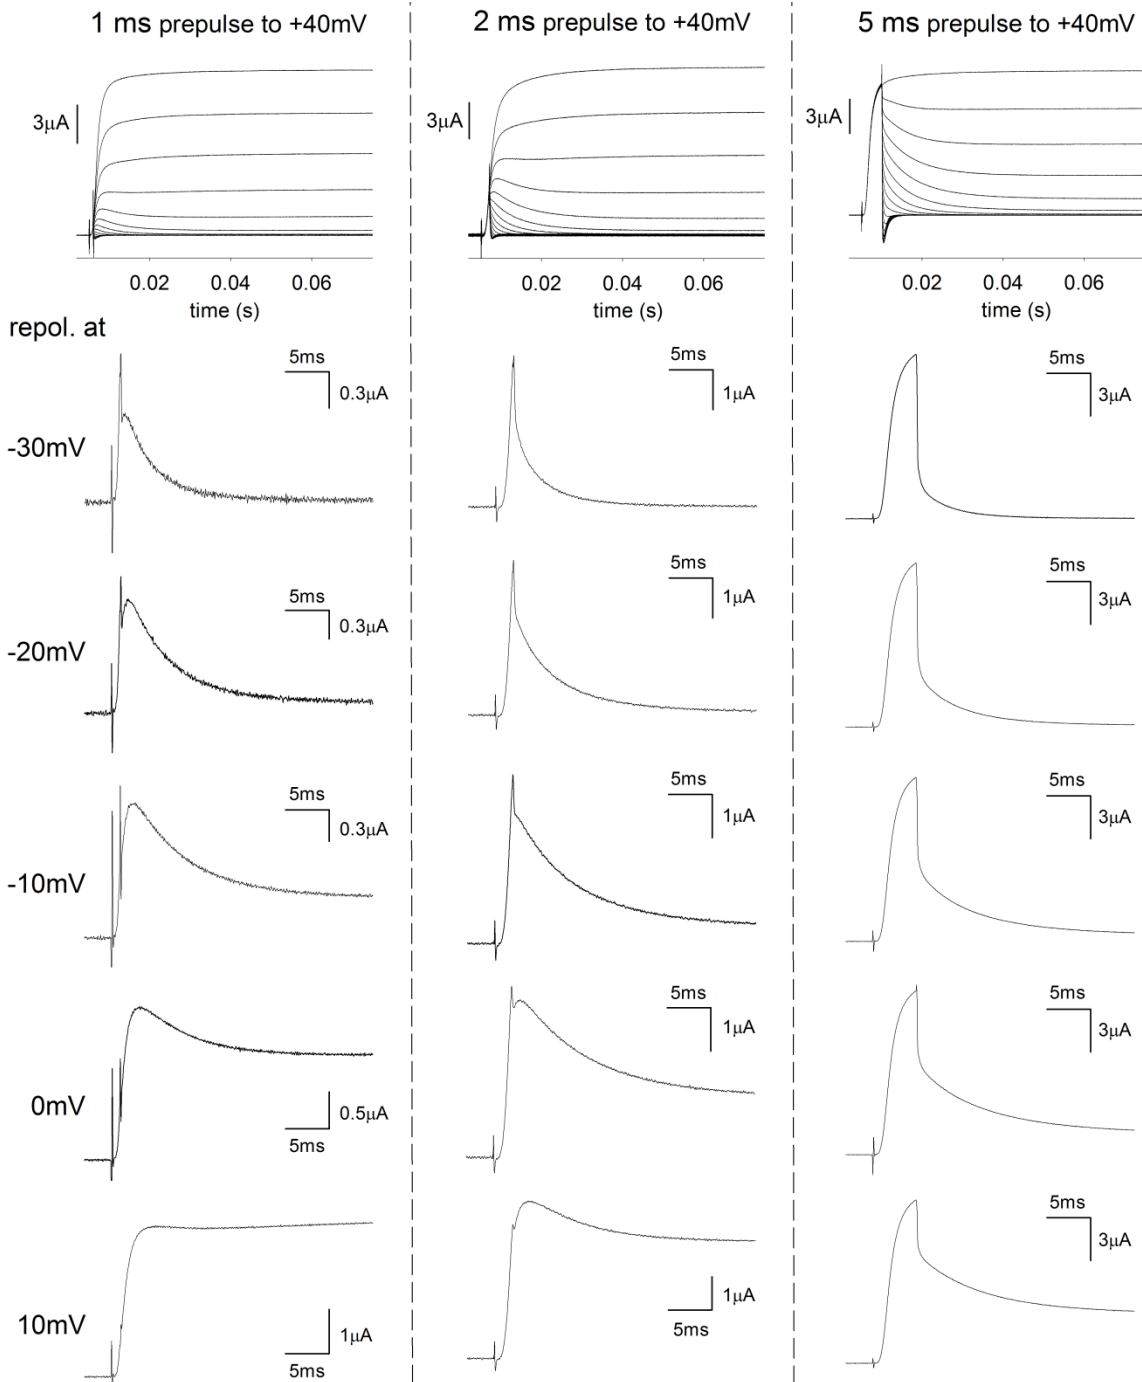

**Supplementary Figure 3:  $K_v3.1b$  resurgent current is temporally and energetically defined.**

Detailed examination of the  $K_v3.1b$  ionic currents obtained upon 1 ms (left column), 2 ms (middle column), and 5 ms (right column) depolarizations to +40 mV, followed by repolarizations ranging from -30 mV (top) to 10 mV (bottom). Resurgent current is clearly seen following the 1 ms prepulse between -30 mV and 0 mV, and is completely absent by extending the depolarizing prepulse duration to 5 ms, suggesting that it occurs specifically in response to brief action potential-like pulses to generate a resurgent current at intermediate voltages to complete repolarization of the membrane.

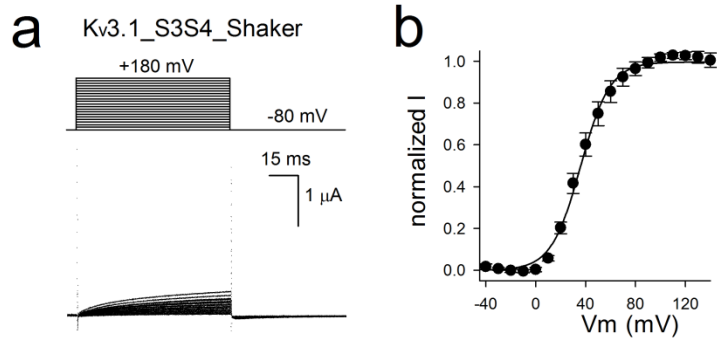

**Supplementary Figure 4: Shaker\_S3S4\_Kv3.1 chimera's voltage dependence of channel opening.**

(a) A representative current recording (pulse protocol at top) of the Kv3.1\_S3S4\_Shaker chimera in 2 mM external and 115 mM internal potassium solution. No currents were found that could be discriminated from leak currents of the oocyte. (b) GV curve of Shaker\_S3S4\_Kv3.1 chimera ( $n = 6$ ) determined from the tail currents obtained with activation pulse protocols (Fig. 6b). Tail current amplitudes were normalized and plotted as a function of the pulse depolarization potential and the represented GV curves are the average fit to a 2-state Boltzmann equation.

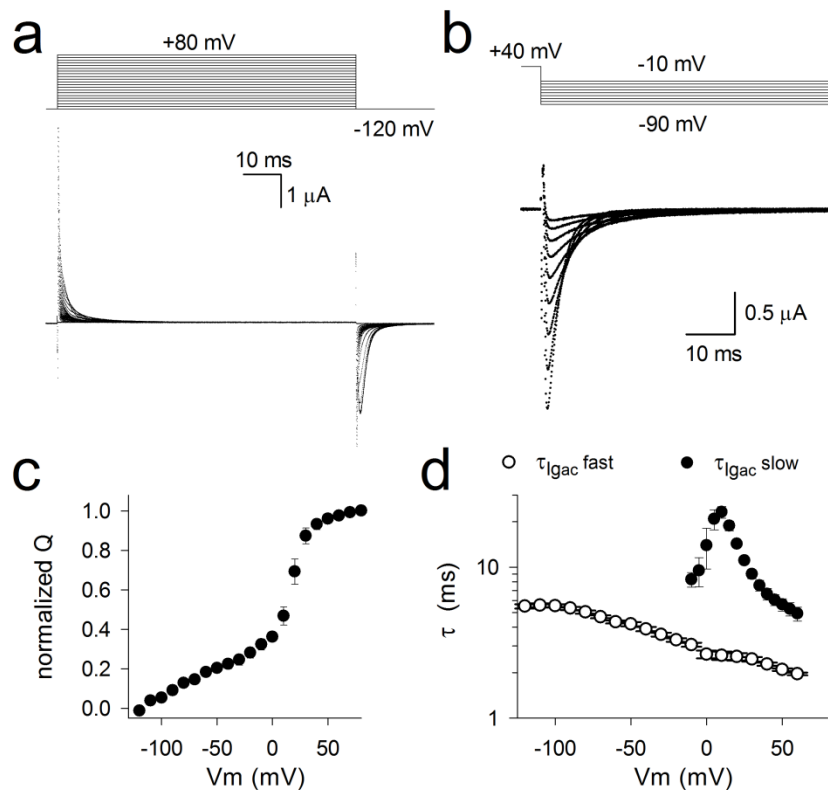

**Supplementary Figure 5: Gating currents of the Shaker\_S3S4\_Kv3.1 W434F chimera.**

(a) Activation ionic currents of the Sh\_S3S4\_Kv3.1 W434F chimera from -120 mV to +80 mV in 10 mV steps. (b) Deactivation ionic currents of the chimera held at +40 mV and pulsed at 10 mV intervals from -10 mV to -90 mV. (c) Q-V curve of the chimera ( $n = 4$ ). (d) Time constants of  $I_{Gac} \pm$  SEM ( $n = 4$ ) plotted versus voltage of the activating pulse. There were two noticeable gating charge components, a fast component that started to move before 0 mV, and a slow component that is responsible for pore opening and emerged with activating pulses above 0 mV.

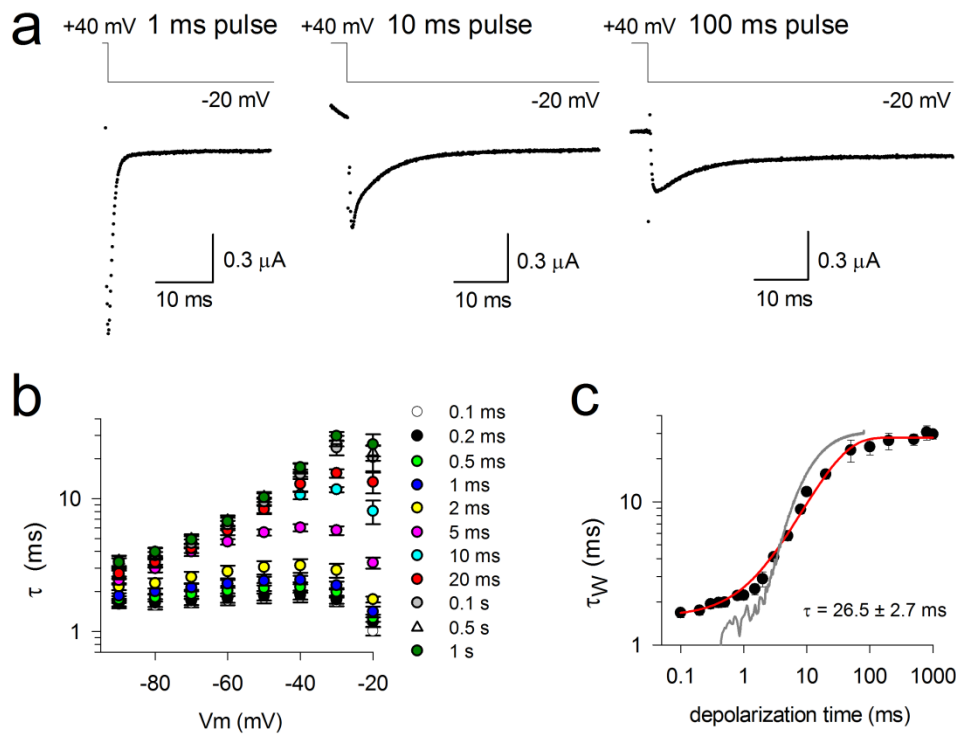

**Supplementary Figure 6:  $I_{Gdeac}$  decay kinetics of the Shaker\_S3S4\_Kv3.1 W434F chimera upon different depolarization times.**

(a)  $I_{Gdeac}$  currents of the Shaker\_S3S4\_Kv3.1 W434F chimera elicited during repolarization to -20 mV upon a 1, 10 and 100ms depolarization to +40 mV (pulse protocol is shown on top). (b) Voltage dependence of the weighted  $I_{Gdeac}$  time constants  $\pm$  SEM ( $n = 6$ ) as a function of depolarizing pulse duration. Note the gradual slowing in  $I_{Gdeac}$  kinetics when depolarization times became longer. (c) The weighted  $I_{Gdeac}$  time constant at -30 mV as a function of depolarization time. The superimposed scaled ionic current activation is shown as a grey trace.

**Supplementary Table 1: Parameters for 4-State Markov Model.**

| Rate constants   | Black, pink, green trace | Red trace | Blue trace |
|------------------|--------------------------|-----------|------------|
| $\alpha_p / z_p$ | .05 / 3.5                | .05 / 3.5 | .05 / 3.5  |
| $\beta_p / z_p$  | .15 / 3.5                | .15 / 3.5 | .15 / 3.5  |
| $\alpha_l / z_l$ | 6 / .4                   | 6 / .4    | 6 / .4     |
| $\beta_l / z_l$  | .6 / .4                  | 1.8 / .4  | .4 / .4    |
| $\alpha_s / z_s$ | 1 / .001                 | 1 / .001  | 1 / .001   |
| $\beta_s / z_s$  | .8 / .001                | .8 / .001 | .8 / .001  |

## Supplementary Discussion

### Voltage-dependence of Shaker\_S3S4\_Kv3.1 gating currents suggests resurgent current is related to the relaxed state

In WT Shaker channels the total gating charge is distributed across several transitions, including transitions between different closed states<sup>2,3</sup>. For a currently undefined reason, the movement of the early gating charge component between different closed states is facilitated in the Shaker\_S3S4\_Kv3.1 W434F chimera; that is, this component of the gating charge is shifted towards more hyperpolarized potentials, isolating it from the main gating charge component that is associated with the transition to the pre-activated VSD configuration. Although the resurgent ionic currents of the Shaker\_S3S4\_Kv3.1 chimera were very similar to those of Kv3.1b, the Kv3.1b gating charge movement showed no such isolation of its early gating charge component. Therefore, the resurgent current most likely does not originate from modifications to the kinetics of this early gating charge component; instead, a process occurring at more positive potentials, such as VSD relaxation, should be responsible.

## References

1. Wang, Z., Robertson, B., & Fedida, D. Gating currents from a Kv3 subfamily potassium channel: charge movement and modification by BDS-II toxin. *J. Physiol.* **584**, 755-767 (2007).
2. Bezanilla, F., Perozo, E., & Stefani, E. Gating of *Shaker* K<sup>+</sup> channels: II. The components of gating currents and a model of channel activation. *Biophys. J.* **66**, 1011-1021 (1994).
3. Bezanilla, F. & Villalba-Galea, C. A. The gating charge should not be estimated by fitting a two-state model to a Q-V curve. *J. Gen. Physiol.* **142**, 575-578 (2013).
